# Supplementary material for: Effect of multi arm-PEG-NHS (polyethylene glycol n-hydroxysuccinimide) branching on cell adhesion to modified decellularized bovine and porcine pericardium
Source: Royal Society of Chemistry journal article supplement (doi:10.1039/d3tb01661g), 2023-12-21
Supplement: d3tb01661g1.pdf [file d3tb01661g1.pdf]

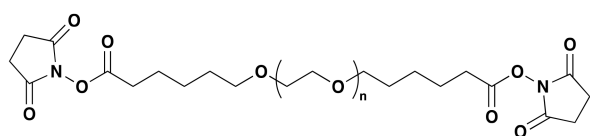

2PEGNHS

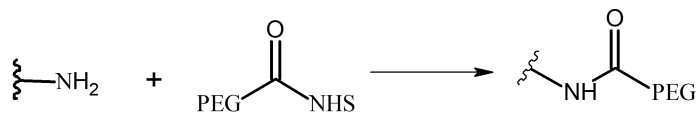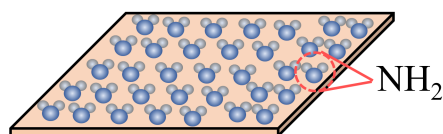

dBPC, dPPC

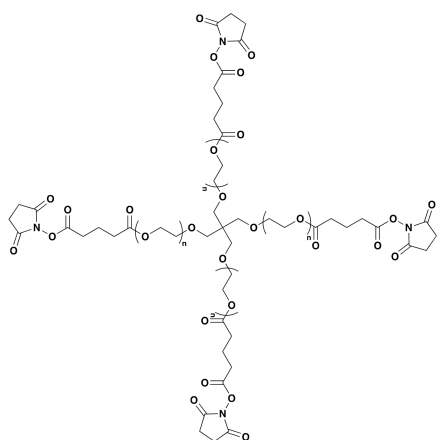

4PEGNHS

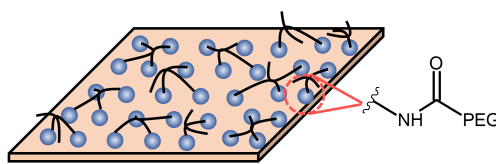

2PEG modified tissue

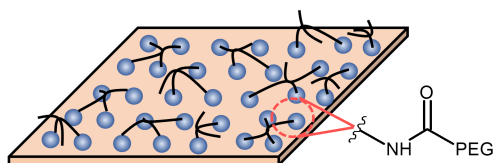

4PEG modified tissue

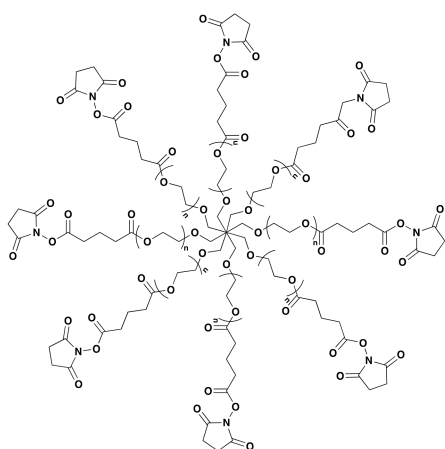

8PEGNHS

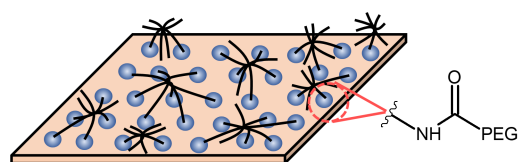

8PEG modified tissue

Figure S1. a) Chemical structure of 2-arm, 4-arm, 8-arm PEG-NHS. b) Mechanical reaction between the material and PEG-NHS molecules. c) Illustration of 2-arm, 4-arm, and 8-arm PEG-NHS-modified dBPC and dPPC. 2,4,8: PEG branches, B,P: bovine, porcine.

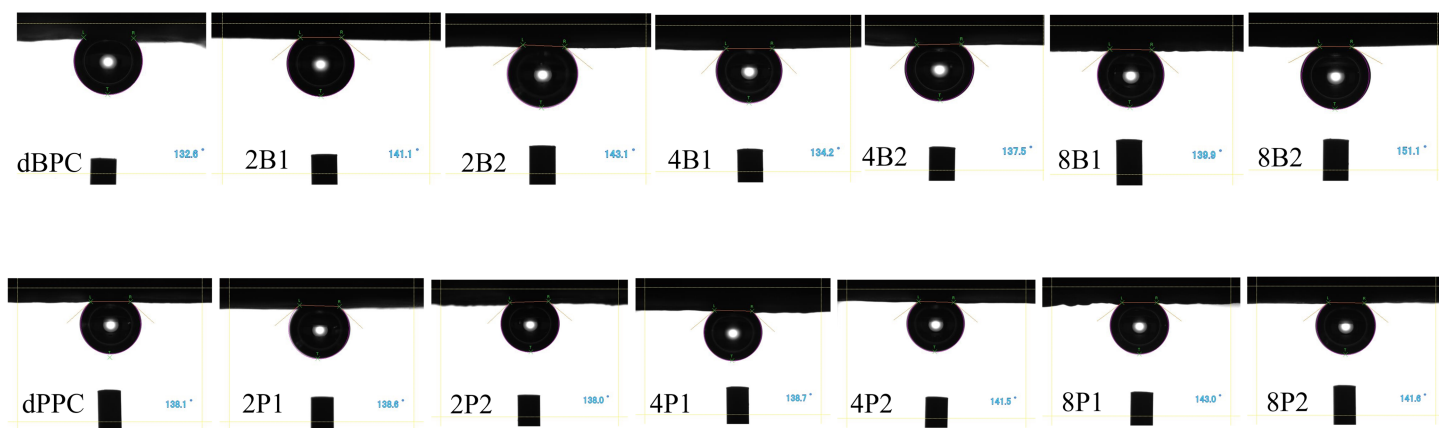

Figure S2. Captive air bubbles of non-modified and PEG-modified decellularized bovine and porcine pericardium. 2,4,8: PEG branches, B,P: bovine, porcine, 1,2: NHS ratio.

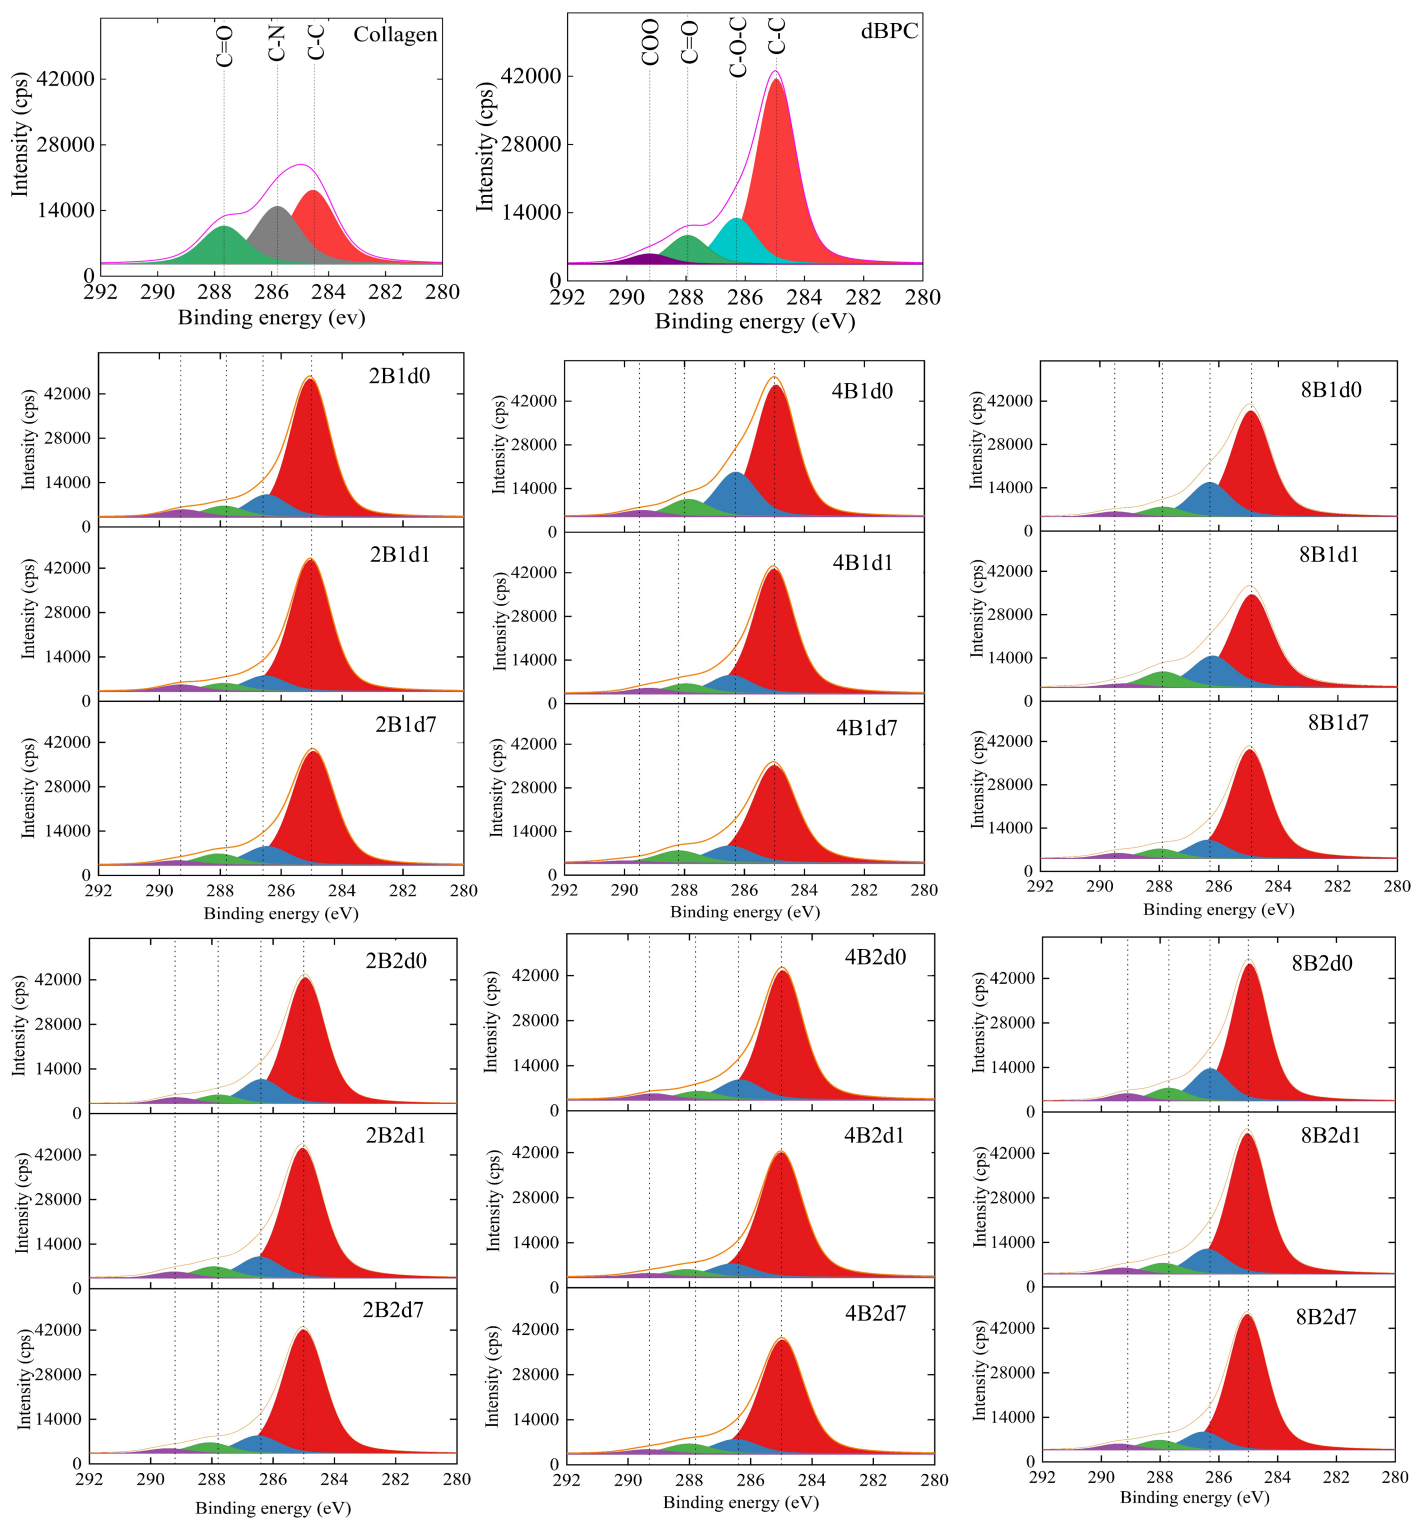

Figure S3. Deconvoluted XPS spectra of non-modified and PEG-modified decellularized bovine pericardium. 2,4,8: PEG branches, 1,2: NHS ratio.

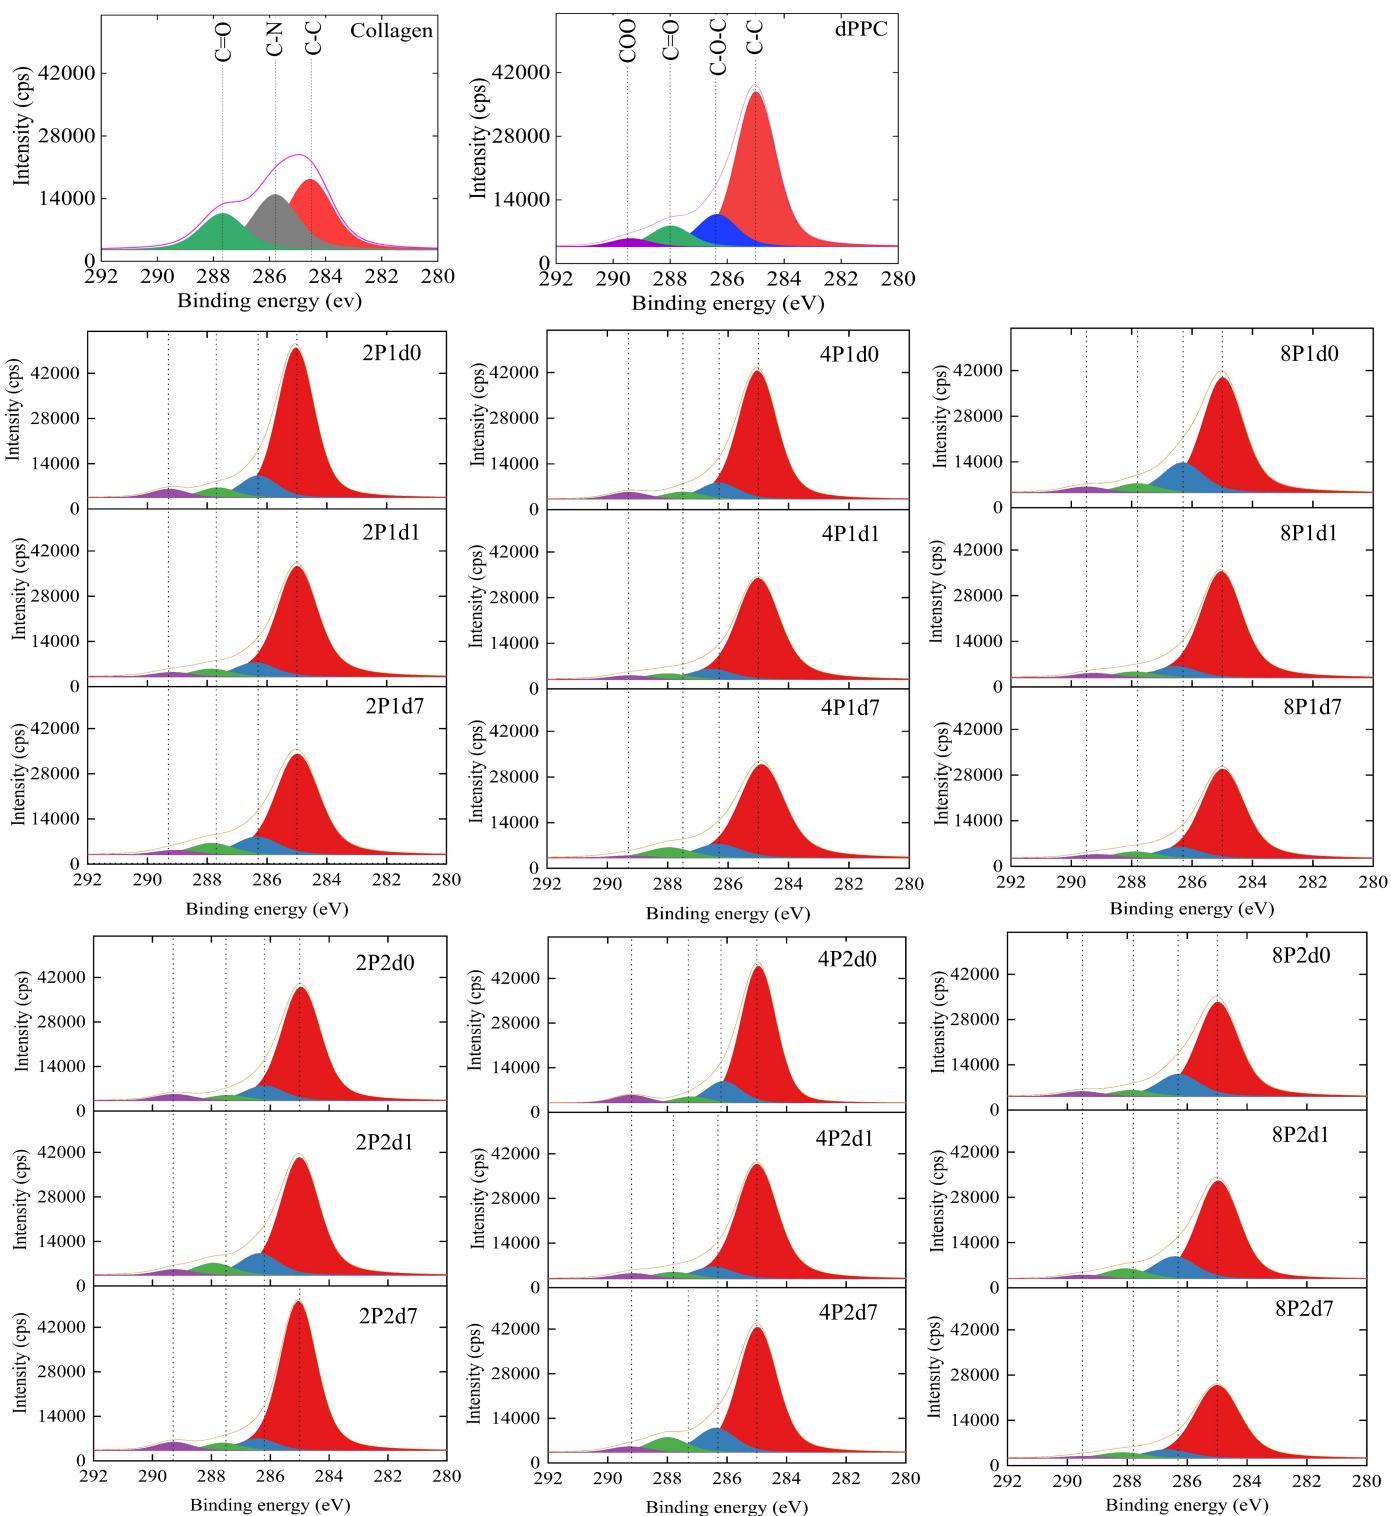

Figure S4. Deconvoluted XPS spectra of non-modified and PEG-modified decellularized porcine pericardium. 2,4,8: PEG branches, 1,2: NHS ratio.
